# Supplementary material for: Oral corticosteroids abuse for the purpose of weight gain : First assessment in Algeria
Source: Research Square preprint supplement (doi:10.21203/rs.3.rs-2046646/v1), 2022-09-21
Supplement: Supplementary file 1 [file 8229272859e67436d98d6ab9.pdf]

| Age(years) | Gender | Education  | Employment | BMI(Kg/m <sup>2</sup> ) | Area of residency | Corticosteroids use |
|------------|--------|------------|------------|-------------------------|-------------------|---------------------|
| 24         | Female | University | Student    | 20.38                   | Urban             | No                  |
| 25         | Female | University | Student    | 17.99                   | Urban             | No                  |
| 23         | Female | University | Student    | 19.81                   | Urban             | No                  |
| 23         | Female | University | Student    | 19.96                   | Urban             | No                  |
| 24         | Female | University | Student    | 18.22                   | Urban             | No                  |
| 25         | Female | University | Student    | 20.89                   | Urban             | No                  |
| 25         | Female | University | Student    | 19.05                   | Urban             | No                  |
| 28         | Female | University | Employed   | 19.47                   | Urban             | No                  |
| 26         | Female | University | Employed   | 16.79                   | Urban             | No                  |
| 23         | Female | University | Employed   | 16.00                   | Urban             | No                  |
| 25         | Male   | University | Student    | 33.24                   | Urban             | Yes                 |
| 27         | Female | University | Unemployed | 18.43                   | Urban             | No                  |
| 20         | Female | University | Student    | 22.27                   | Urban             | No                  |
| 20         | Female | University | Student    | 18.34                   | Urban             | No                  |
| 21         | Female | University | Student    | 22.86                   | Urban             | No                  |
| 25         | Female | University | Student    | 16.16                   | Urban             | No                  |
| 21         | Female | University | Student    | 17.56                   | Rural             | No                  |
| 24         | Female | University | Student    | 21.88                   | Urban             | No                  |
| 23         | Female | University | Student    | 17.30                   | Urban             | No                  |
| 20         | Female | University | Student    | 26.57                   | Urban             | No                  |
| 19         | Female | University | Student    | 17.89                   | Urban             | No                  |
| 21         | Female | University | Student    | 16.65                   | Urban             | No                  |
| 20         | Female | University | Student    | 20.76                   | Urban             | No                  |
| 23         | Female | University | Student    | 22.04                   | Urban             | No                  |
| 25         | Female | University | Unemployed | 18.59                   | Urban             | No                  |
| 25         | Female | University | Employed   | 20.70                   | Urban             | No                  |
| 24         | Female | University | Employed   | 24.61                   | Urban             | Yes                 |
| 24         | Female | University | Employed   | 23.83                   | Urban             | No                  |
| 23         | Female | Secondary  | Unemployed | 23.44                   | Urban             | Yes                 |
| 22         | Female | University | Student    | 18.44                   | Urban             | No                  |
| 20         | Female | University | Student    | 23.44                   | Urban             | No                  |
| 24         | Female | University | Employed   | 20.17                   | Urban             | No                  |
| 24         | Female | University | Employed   | 22.77                   | Rural             | No                  |
| 29         | Female | University | Employed   | 21.48                   | Urban             | No                  |
| 23         | Female | University | Student    | 21.37                   | Urban             | No                  |
| 28         | Female | University | Employed   | 18.44                   | Urban             | No                  |
| 24         | Female | University | Student    | 18.65                   | Urban             | No                  |
| 28         | Female | University | Employed   | 19.29                   | Rural             | No                  |
| 23         | Male   | University | Student    | 23.18                   | Rural             | Yes                 |
| 28         | Female | University | Employed   | 15.94                   | Urban             | No                  |
| 27         | Female | University | Employed   | 24.91                   | Urban             | No                  |
| 23         | Female | University | Student    | 25.71                   | Urban             | No                  |
| 34         | Female | University | Employed   | 17.22                   | Urban             | No                  |
| 27         | Female | University | Unemployed | 20.82                   | Urban             | No                  |
| 26         | Female | University | Unemployed | 22.66                   | Urban             | Yes                 |
| 23         | Female | University | Student    | 16.65                   | Urban             | No                  |

|    |        |            |            |       |       |     |
|----|--------|------------|------------|-------|-------|-----|
| 23 | Female | University | Student    | 22.48 | Urban | No  |
| 28 | Male   | University | Employed   | 24.22 | Urban | Yes |
| 28 | Female | University | Unemployed | 20.96 | Urban | No  |
| 20 | Female | University | Student    | 20.08 | Urban | No  |
| 21 | Female | University | Employed   | 21.45 | Urban | No  |
| 20 | Female | University | Student    | 19.10 | Urban | No  |
| 26 | Female | University | Unemployed | 18.53 | Urban | No  |
| 22 | Female | University | Student    | 18.82 | Urban | No  |
| 23 | Male   | University | Employed   | 18.99 | Urban | No  |
| 21 | Female | University | Student    | 20.20 | Rural | Yes |
| 25 | Female | University | Student    | 21.09 | Urban | No  |
| 27 | Female | University | Unemployed | 18.49 | Urban | No  |
| 28 | Male   | University | Employed   | 18.99 | Urban | Yes |
| 25 | Female | University | Employed   | 23.73 | Urban | No  |
| 25 | Male   | University | Student    | 23.46 | Urban | No  |
| 27 | Female | University | Employed   | 21.55 | Urban | No  |
| 24 | Female | University | Student    | 23.88 | Urban | No  |
| 26 | Female | University | Unemployed | 21.67 | Urban | No  |
| 27 | Female | University | Employed   | 23.44 | Urban | No  |
| 24 | Female | University | Student    | 21.26 | Urban | No  |
| 28 | Male   | University | Employed   | 23.57 | Urban | No  |
| 30 | Female | University | Employed   | 23.63 | Urban | No  |
| 26 | Female | University | Student    | 23.01 | Urban | No  |
| 26 | Female | University | Student    | 24.01 | Urban | No  |
| 23 | Female | University | Student    | 18.71 | Urban | No  |
| 28 | Male   | University | Employed   | 28.41 | Urban | Yes |
| 20 | Female | University | Student    | 19.88 | Urban | No  |
| 23 | Male   | University | Student    | 19.71 | Urban | No  |
| 26 | Male   | University | Employed   | 22.15 | Urban | No  |
| 32 | Male   | University | Employed   | 25.90 | Urban | Yes |
| 23 | Female | University | Student    | 19.05 | Rural | No  |
| 29 | Male   | University | Unemployed | 21.30 | Urban | No  |
| 21 | Female | University | Student    | 19.53 | Urban | No  |
| 24 | Female | University | Student    | 19.94 | Urban | No  |
| 24 | Female | University | Student    | 18.22 | Urban | No  |
| 25 | Female | University | Employed   | 20.07 | Urban | Yes |
| 27 | Female | University | Employed   | 22.58 | Urban | No  |
| 24 | Female | University | Student    | 21.45 | Urban | No  |
| 26 | Female | University | Employed   | 19.49 | Urban | No  |
| 31 | Female | University | Employed   | 19.57 | Urban | No  |
| 29 | Female | University | Employed   | 20.58 | Urban | Yes |
| 32 | Female | University | Employed   | 20.58 | Urban | No  |
| 26 | Female | University | Employed   | 30.47 | Urban | No  |
| 25 | Female | University | Unemployed | 19.03 | Urban | No  |
| 19 | Female | University | Student    | 19.53 | Urban | No  |
| 23 | Female | University | Employed   | 21.09 | Urban | Yes |

|    |        |             |            |       |       |     |
|----|--------|-------------|------------|-------|-------|-----|
| 23 | Female | University  | Student    | 22.10 | Urban | No  |
| 37 | Male   | University  | Employed   | 33.81 | Urban | No  |
| 30 | Female | University  | Employed   | 20.72 | Urban | No  |
| 20 | Female | University  | Student    | 20.20 | Urban | No  |
| 24 | Female | University  | Employed   | 16.14 | Urban | No  |
| 46 | Female | High school | Employed   | 36.73 | Urban | Yes |
| 23 | Female | University  | Student    | 20.42 | Urban | No  |
| 67 | Female | University  | Retired    | 26.37 | Urban | No  |
| 23 | Female | University  | Student    | 20.58 | Urban | No  |
| 44 | Female | University  | Employed   | 32.81 | Urban | No  |
| 22 | Male   | University  | Student    | 15.23 | Urban | No  |
| 23 | Female | University  | Student    | 17.78 | Urban | No  |
| 29 | Female | University  | Employed   | 15.55 | Urban | No  |
| 22 | Female | University  | Employed   | 18.91 | Urban | No  |
| 28 | Female | University  | Employed   | 20.08 | Urban | Yes |
| 25 | Female | University  | Employed   | 20.28 | Urban | No  |
| 23 | Male   | University  | Student    | 20.01 | Urban | Yes |
| 25 | Female | University  | Student    | 25.08 | Urban | Yes |
| 23 | Female | University  | Student    | 27.04 | Urban | No  |
| 22 | Female | University  | Student    | 16.73 | Urban | No  |
| 21 | Male   | University  | Student    | 22.84 | Urban | No  |
| 24 | Female | University  | Student    | 19.61 | Rural | No  |
| 25 | Female | University  | Student    | 26.03 | Urban | Yes |
| 27 | Female | University  | Employed   | 18.56 | Urban | Yes |
| 27 | Female | University  | Unemployed | 20.17 | Urban | No  |
| 21 | Female | University  | Student    | 16.65 | Urban | No  |
| 25 | Female | University  | Student    | 23.23 | Rural | No  |
| 22 | Female | University  | Student    | 18.59 | Urban | No  |
| 20 | Female | University  | Student    | 29.30 | Urban | No  |
| 22 | Female | University  | Student    | 17.69 | Urban | No  |
| 26 | Female | University  | Employed   | 21.48 | Rural | No  |
| 22 | Female | University  | Student    | 20.03 | Urban | No  |
| 22 | Female | University  | Student    | 17.97 | Urban | No  |
| 23 | Male   | University  | Student    | 22.02 | Urban | No  |
| 24 | Female | University  | Student    | 22.66 | Urban | No  |
| 20 | Female | University  | Student    | 19.92 | Urban | No  |
| 37 | Male   | University  | Employed   | 22.47 | Urban | No  |
| 24 | Male   | University  | Student    | 22.20 | Urban | No  |
| 29 | Female | University  | Student    | 22.31 | Urban | No  |
| 23 | Female | University  | Student    | 16.65 | Urban | No  |
| 24 | Female | University  | Student    | 20.93 | Urban | No  |
| 25 | Female | University  | Student    | 24.86 | Urban | No  |
| 39 | Female | University  | Employed   | 20.70 | Urban | No  |
| 25 | Female | University  | Student    | 16.61 | Urban | No  |
| 26 | Female | University  | Unemployed | 20.60 | Urban | No  |
| 22 | Female | University  | Student    | 20.07 | Urban | No  |

|    |        |             |            |       |       |     |
|----|--------|-------------|------------|-------|-------|-----|
| 25 | Female | University  | Student    | 20.20 | Urban | No  |
| 23 | Female | University  | Student    | 19.88 | Urban | No  |
| 25 | Female | University  | Student    | 18.69 | Urban | No  |
| 31 | Female | University  | Employed   | 22.77 | Urban | No  |
| 25 | Female | University  | Student    | 21.20 | Urban | No  |
| 27 | Female | University  | Employed   | 18.87 | Urban | No  |
| 25 | Female | University  | Employed   | 15.82 | Urban | Yes |
| 27 | Male   | University  | Employed   | 24.73 | Urban | No  |
| 27 | Male   | University  | Employed   | 22.20 | Urban | No  |
| 27 | Female | University  | Employed   | 18.14 | Urban | No  |
| 22 | Female | University  | Student    | 19.83 | Urban | No  |
| 34 | Female | University  | Employed   | 20.96 | Urban | No  |
| 24 | Male   | University  | Student    | 20.05 | Urban | No  |
| 24 | Female | University  | Student    | 18.38 | Urban | No  |
| 24 | Male   | University  | Student    | 20.65 | Urban | No  |
| 23 | Male   | University  | Student    | 18.17 | Urban | No  |
| 22 | Female | University  | Student    | 20.03 | Rural | No  |
| 23 | Male   | Primary     | Student    | 19.57 | Urban | No  |
| 24 | Female | University  | Student    | 18.08 | Urban | No  |
| 23 | Female | High school | Unemployed | 25.56 | Urban | No  |
| 27 | Female | University  | Unemployed | 24.97 | Urban | No  |
| 38 | Female | University  | Employed   | 18.37 | Urban | Yes |
| 21 | Female | University  | Unemployed | 19.23 | Urban | Yes |
| 21 | Female | University  | Unemployed | 19.23 | Urban | Yes |
| 29 | Female | High school | Unemployed | 24.02 | Urban | No  |
| 23 | Male   | University  | Student    | 21.20 | Urban | Yes |
| 34 | Female | University  | Employed   | 24.38 | Urban | No  |
| 23 | Male   | University  | Student    | 19.44 | Urban | Yes |
| 21 | Female | University  | Student    | 19.20 | Urban | No  |
| 34 | Male   | University  | Employed   | 18.47 | Urban | Yes |
| 23 | Female | University  | Student    | 18.10 | Urban | No  |
| 20 | Female | University  | Employed   | 18.73 | Urban | Yes |
| 21 | Female | University  | Student    | 20.44 | Urban | No  |
| 26 | Female | University  | Unemployed | 20.31 | Urban | No  |
| 27 | Male   | University  | Employed   | 25.47 | Urban | Yes |
| 19 | Female | University  | Student    | 17.57 | Urban | No  |
| 21 | Female | University  | Student    | 23.62 | Urban | No  |
| 22 | Female | University  | Unemployed | 26.53 | Rural | Yes |
| 20 | Female | University  | Student    | 20.31 | Urban | No  |
| 20 | Female | University  | Student    | 20.31 | Urban | No  |
| 25 | Female | University  | Employed   | 23.18 | Urban | No  |
| 21 | Female | University  | Student    | 15.23 | Urban | Yes |
| 20 | Female | University  | Student    | 23.44 | Urban | No  |
| 21 | Female | University  | Student    | 19.23 | Urban | No  |
| 26 | Female | University  | Student    | 23.23 | Urban | No  |
| 23 | Female | University  | Employed   | 19.03 | Urban | No  |

|    |        |             |            |       |       |     |
|----|--------|-------------|------------|-------|-------|-----|
| 20 | Female | University  | Student    | 20.43 | Rural | No  |
| 25 | Female | University  | Student    | 19.53 | Urban | No  |
| 22 | Female | University  | Student    | 17.85 | Urban | No  |
| 21 | Female | University  | Student    | 19.95 | Urban | No  |
| 29 | Male   | University  | Unemployed | 19.59 | Urban | No  |
| 27 | Male   | University  | Employed   | 20.90 | Urban | No  |
| 20 | Female | University  | Student    | 19.14 | Rural | No  |
| 21 | Female | University  | Employed   | 24.22 | Urban | No  |
| 22 | Female | University  | Student    | 17.53 | Urban | No  |
| 24 | Female | University  | Employed   | 16.94 | Urban | No  |
| 21 | Male   | University  | Student    | 22.49 | Urban | Yes |
| 23 | Female | University  | Employed   | 20.20 | Urban | Yes |
| 26 | Female | University  | Student    | 19.72 | Urban | No  |
| 23 | Female | University  | Student    | 19.53 | Urban | No  |
| 26 | Male   | University  | Unemployed | 18.83 | Urban | No  |
| 18 | Female | University  | Student    | 15.57 | Urban | Yes |
| 43 | Female | High school | Employed   | 20.94 | Urban | No  |
| 17 | Female | High school | Unemployed | 16.53 | Urban | No  |
| 20 | Female | University  | Student    | 17.63 | Urban | No  |
| 31 | Male   | High school | Employed   | 17.87 | Urban | No  |
| 20 | Female | University  | Student    | 20.81 | Urban | Yes |
| 25 | Female | University  | Student    | 17.72 | Urban | No  |
| 24 | Female | University  | Student    | 19.43 | Urban | No  |
| 21 | Female | University  | Student    | 19.83 | Urban | No  |
| 23 | Female | University  | Employed   | 20.20 | Urban | No  |
| 19 | Female | University  | Unemployed | 19.53 | Urban | No  |
| 21 | Male   | University  | Student    | 16.55 | Urban | No  |
| 20 | Female | University  | Student    | 17.58 | Urban | No  |
| 28 | Male   | University  | Employed   | 23.84 | Urban | Yes |
| 26 | Female | University  | Unemployed | 20.08 | Urban | No  |
| 22 | Male   | University  | Employed   | 19.20 | Urban | No  |
| 26 | Female | University  | Unemployed | 24.02 | Urban | Yes |
| 23 | Male   | University  | Student    | 23.67 | Urban | No  |
| 27 | Male   | University  | Employed   | 23.78 | Urban | No  |
| 23 | Female | University  | Student    | 23.80 | Urban | No  |
| 22 | Female | University  | Student    | 22.31 | Urban | No  |
| 27 | Female | University  | Employed   | 19.98 | Urban | Yes |
| 27 | Male   | University  | Employed   | 23.51 | Urban | No  |
| 29 | Male   | University  | Employed   | 19.66 | Urban | No  |
| 22 | Female | University  | Student    | 19.47 | Urban | Yes |
| 25 | Female | University  | Student    | 17.63 | Urban | No  |
| 24 | Male   | University  | Employed   | 25.88 | Urban | Yes |
| 21 | Female | University  | Student    | 20.44 | Urban | No  |
| 18 | Female | University  | Student    | 17.91 | Urban | No  |
| 29 | Female | University  | Student    | 28.31 | Rural | Yes |
| 20 | Female | University  | Student    | 18.75 | Urban | Yes |

|    |        |             |            |       |       |     |
|----|--------|-------------|------------|-------|-------|-----|
| 25 | Male   | University  | Student    | 21.55 | Urban | No  |
| 23 | Female | University  | Student    | 23.44 | Urban | Yes |
| 19 | Male   | University  | Student    | 18.52 | Urban | No  |
| 29 | Female | University  | Employed   | 22.96 | Urban | Yes |
| 21 | Female | University  | Student    | 21.41 | Urban | No  |
| 27 | Female | University  | Employed   | 18.37 | Urban | No  |
| 24 | Female | University  | Student    | 21.45 | Urban | No  |
| 24 | Female | University  | Student    | 21.08 | Urban | No  |
| 24 | Female | University  | Student    | 17.21 | Rural | No  |
| 27 | Female | University  | Employed   | 18.59 | Urban | Yes |
| 28 | Female | High school | Employed   | 24.22 | Urban | No  |
| 23 | Female | University  | Student    | 18.29 | Urban | Yes |
| 18 | Female | University  | Student    | 17.72 | Urban | No  |
| 23 | Female | University  | Student    | 23.14 | Urban | No  |
| 30 | Female | University  | Employed   | 17.48 | Urban | Yes |
| 24 | Female | University  | Employed   | 18.22 | Urban | Yes |
| 27 | Female | University  | Unemployed | 19.92 | Urban | No  |
| 23 | Female | University  | Student    | 23.44 | Urban | Yes |
| 20 | Female | University  | Student    | 19.20 | Urban | No  |
| 30 | Male   | University  | Employed   | 21.22 | Urban | Yes |
| 23 | Male   | University  | Student    | 22.49 | Rural | No  |
| 24 | Male   | University  | Employed   | 26.06 | Urban | Yes |
| 23 | Female | University  | Employed   | 23.53 | Urban | Yes |
| 22 | Female | University  | Student    | 19.33 | Urban | No  |
| 26 | Female | University  | Employed   | 22.58 | Urban | No  |
| 28 | Male   | University  | Employed   | 20.52 | Urban | No  |
| 20 | Female | University  | Student    | 20.57 | Urban | No  |
| 18 | Female | University  | Student    | 17.93 | Urban | No  |
| 22 | Female | University  | Student    | 17.51 | Urban | No  |
| 26 | Female | University  | Student    | 18.73 | Rural | No  |
| 20 | Female | University  | Student    | 20.45 | Urban | No  |
| 23 | Female | University  | Student    | 19.83 | Urban | No  |
| 19 | Female | University  | Student    | 18.99 | Urban | No  |
| 23 | Male   | University  | Employed   | 19.37 | Urban | No  |
| 24 | Female | University  | Student    | 18.37 | Urban | No  |
| 27 | Female | University  | Employed   | 19.53 | Urban | No  |
| 21 | Female | University  | Student    | 18.37 | Rural | No  |
| 27 | Male   | University  | Employed   | 19.03 | Urban | Yes |
| 20 | Female | University  | Student    | 16.85 | Urban | No  |
| 24 | Female | University  | Student    | 22.10 | Urban | No  |
| 24 | Female | University  | Student    | 18.44 | Urban | Yes |
| 19 | Female | University  | Student    | 16.88 | Urban | No  |
| 30 | Male   | High school | Employed   | 22.49 | Urban | No  |
| 35 | Female | University  | Employed   | 27.34 | Urban | No  |
| 21 | Female | University  | Student    | 17.33 | Urban | No  |
| 21 | Female | University  | Student    | 17.33 | Urban | No  |

|    |        |             |            |       |       |     |
|----|--------|-------------|------------|-------|-------|-----|
| 22 | Male   | University  | Student    | 22.40 | Urban | Yes |
| 22 | Female | University  | Student    | 22.64 | Urban | No  |
| 27 | Female | University  | Unemployed | 19.43 | Rural | No  |
| 24 | Female | University  | Student    | 21.63 | Urban | Yes |
| 20 | Female | University  | Student    | 20.32 | Urban | No  |
| 28 | Female | University  | Unemployed | 19.47 | Urban | No  |
| 33 | Male   | University  | Employed   | 24.36 | Urban | No  |
| 26 | Male   | University  | Employed   | 20.55 | Urban | No  |
| 25 | Male   | University  | Unemployed | 24.22 | Rural | No  |
| 23 | Female | University  | Employed   | 20.70 | Urban | Yes |
| 29 | Male   | University  | Employed   | 27.76 | Rural | Yes |
| 32 | Male   | University  | Employed   | 26.75 | Urban | Yes |
| 26 | Male   | University  | Employed   | 23.94 | Rural | Yes |
| 25 | Female | University  | Student    | 17.30 | Urban | No  |
| 30 | Male   | Primary     | Retired    | 16.62 | Urban | Yes |
| 25 | Male   | University  | Student    | 21.50 | Urban | No  |
| 23 | Female | University  | Employed   | 19.81 | Urban | No  |
| 22 | Male   | University  | Student    | 18.79 | Urban | Yes |
| 21 | Female | University  | Student    | 22.10 | Urban | No  |
| 22 | Female | High school | Unemployed | 20.69 | Urban | No  |
| 31 | Male   | University  | Employed   | 20.59 | Urban | No  |
| 24 | Female | University  | Student    | 21.72 | Urban | No  |
| 24 | Female | University  | Unemployed | 22.04 | Urban | No  |
| 23 | Male   | High school | Unemployed | 20.02 | Urban | No  |
| 20 | Female | University  | Student    | 20.44 | Urban | No  |
| 27 | Male   | High school | Employed   | 21.31 | Urban | No  |
| 36 | Female | University  | Employed   | 20.70 | Urban | No  |
| 25 | Female | University  | Employed   | 20.96 | Urban | No  |
| 24 | Male   | University  | Employed   | 19.38 | Urban | No  |
| 20 | Female | University  | Student    | 16.02 | Urban | No  |
| 22 | Female | University  | Student    | 17.65 | Urban | No  |
| 30 | Female | University  | Employed   | 25.71 | Urban | No  |
| 27 | Female | University  | Unemployed | 21.09 | Urban | No  |
| 23 | Male   | High school | Unemployed | 20.02 | Urban | No  |
| 22 | Female | University  | Employed   | 22.58 | Rural | No  |
| 24 | Female | University  | Employed   | 20.70 | Urban | No  |
| 25 | Female | University  | Student    | 18.59 | Urban | No  |
| 26 | Male   | High school | Unemployed | 17.82 | Urban | No  |
| 27 | Female | University  | Unemployed | 21.76 | Urban | No  |
| 32 | Male   | University  | Employed   | 20.06 | Urban | No  |
| 23 | Male   | University  | Student    | 22.72 | Urban | No  |
| 23 | Female | University  | Student    | 21.67 | Urban | No  |
| 25 | Female | University  | Employed   | 19.53 | Rural | No  |
| 18 | Female | University  | Student    | 17.63 | Urban | No  |
| 26 | Female | University  | Student    | 18.07 | Urban | No  |
| 25 | Male   | University  | Unemployed | 22.09 | Rural | Yes |

|    |        |            |            |       |       |     |
|----|--------|------------|------------|-------|-------|-----|
| 23 | Female | University | Student    | 20.20 | Urban | No  |
| 22 | Female | University | Student    | 23.95 | Urban | No  |
| 24 | Female | University | Student    | 15.94 | Urban | No  |
| 20 | Female | University | Student    | 18.73 | Urban | No  |
| 40 | Male   | University | Employed   | 19.37 | Urban | No  |
| 30 | Female | University | Employed   | 30.10 | Urban | Yes |
| 22 | Female | University | Student    | 16.96 | Urban | No  |
| 24 | Female | University | Unemployed | 22.31 | Urban | No  |
| 30 | Female | University | Unemployed | 21.30 | Urban | No  |
| 35 | Female | University | Employed   | 24.80 | Urban | No  |
| 32 | Male   | University | Employed   | 25.98 | Urban | No  |
| 24 | Female | University | Student    | 21.83 | Urban | No  |
| 30 | Female | University | Unemployed | 23.88 | Urban | No  |
| 23 | Female | University | Employed   | 19.36 | Urban | Yes |
| 27 | Female | University | Unemployed | 24.09 | Rural | No  |
| 25 | Female | University | Employed   | 20.08 | Rural | No  |
| 25 | Female | University | Unemployed | 17.85 | Urban | No  |
| 25 | Female | University | Unemployed | 18.04 | Urban | No  |
| 26 | Female | University | Employed   | 22.48 | Urban | No  |
| 24 | Female | University | Student    | 20.08 | Urban | No  |
| 23 | Female | University | Student    | 18.80 | Urban | No  |
| 38 | Female | University | Employed   | 21.88 | Urban | No  |
| 37 | Female | University | Unemployed | 24.00 | Urban | No  |
| 23 | Female | University | Unemployed | 19.84 | Urban | No  |
| 27 | Female | University | Employed   | 21.26 | Urban | No  |
| 26 | Male   | University | Student    | 25.59 | Urban | No  |
| 24 | Female | University | Student    | 17.31 | Urban | No  |
| 26 | Female | University | Unemployed | 20.80 | Urban | No  |
| 20 | Male   | University | Student    | 23.05 | Urban | No  |
| 19 | Female | University | Student    | 16.41 | Urban | No  |
| 20 | Male   | University | Student    | 29.73 | Urban | No  |
| 22 | Female | University | Student    | 23.42 | Urban | No  |
| 27 | Female | University | Unemployed | 20.31 | Urban | No  |
| 36 | Female | University | Employed   | 21.76 | Urban | No  |
| 26 | Female | University | Student    | 24.22 | Urban | No  |
| 26 | Female | University | Employed   | 18.14 | Urban | Yes |
| 34 | Female | University | Unemployed | 22.04 | Urban | No  |
| 19 | Female | University | Student    | 19.31 | Urban | Yes |
| 26 | Female | University | Unemployed | 18.71 | Urban | No  |
| 27 | Female | University | Unemployed | 16.80 | Urban | No  |
| 22 | Female | University | Student    | 27.34 | Urban | No  |
| 22 | Male   | University | Student    | 20.07 | Urban | No  |
| 22 | Female | University | Student    | 21.45 | Urban | No  |
| 21 | Female | University | Student    | 20.07 | Rural | Yes |
| 27 | Male   | University | Unemployed | 20.88 | Urban | Yes |
| 25 | Female | University | Student    | 19.05 | Urban | No  |



|    |        |             |            |       |       |     |
|----|--------|-------------|------------|-------|-------|-----|
| 29 | Female | University  | Employed   | 19.47 | Rural | Yes |
| 19 | Female | University  | Student    | 21.11 | Urban | Yes |
| 36 | Female | University  | Unemployed | 26.73 | Urban | Yes |
| 27 | Female | University  | Student    | 17.93 | Urban | No  |
| 23 | Male   | University  | Student    | 21.13 | Urban | Yes |
| 22 | Female | University  | Student    | 20.55 | Urban | No  |
| 17 | Male   | High school | Unemployed | 18.94 | Urban | No  |
| 22 | Female | University  | Student    | 24.46 | Urban | No  |
| 24 | Female | University  | Student    | 16.53 | Urban | No  |
| 31 | Female | University  | Employed   | 18.75 | Urban | No  |
| 28 | Female | Secondary   | Unemployed | 22.27 | Urban | Yes |
| 22 | Female | University  | Student    | 19.92 | Urban | Yes |
| 25 | Female | University  | Student    | 19.72 | Urban | No  |
| 26 | Female | University  | Student    | 21.87 | Urban | No  |
| 20 | Female | University  | Student    | 18.67 | Urban | Yes |
| 18 | Female | University  | Student    | 16.44 | Urban | No  |
| 35 | Female | University  | Unemployed | 26.04 | Urban | No  |
| 23 | Female | University  | Employed   | 20.44 | Urban | No  |
| 27 | Male   | University  | Employed   | 21.39 | Urban | No  |
| 19 | Female | University  | Student    | 20.45 | Urban | No  |
| 25 | Female | University  | Student    | 19.14 | Urban | No  |
| 36 | Female | University  | Employed   | 18.29 | Rural | No  |
| 19 | Female | University  | Student    | 22.66 | Urban | No  |
| 21 | Male   | University  | Student    | 19.37 | Urban | No  |
| 27 | Male   | University  | Student    | 19.88 | Urban | No  |
| 20 | Male   | University  | Student    | 18.47 | Urban | Yes |
| 27 | Male   | University  | Unemployed | 21.01 | Urban | No  |
| 33 | Male   | University  | Employed   | 19.97 | Urban | No  |
| 30 | Female | University  | Employed   | 24.51 | Urban | No  |
| 36 | Female | University  | Employed   | 31.51 | Urban | No  |
| 35 | Male   | University  | Employed   | 23.53 | Urban | No  |
| 20 | Female | University  | Student    | 19.88 | Urban | Yes |
| 25 | Female | University  | Student    | 20.20 | Urban | No  |
| 30 | Male   | University  | Unemployed | 20.29 | Urban | No  |
| 42 | Female | University  | Employed   | 21.55 | Urban | No  |
| 31 | Female | University  | Employed   | 21.72 | Urban | No  |
| 23 | Male   | University  | Student    | 15.89 | Urban | No  |
| 30 | Female | University  | Unemployed | 30.42 | Urban | No  |
| 41 | Female | University  | Employed   | 35.50 | Urban | No  |
| 34 | Male   | High school | Employed   | 20.06 | Urban | No  |
| 32 | Female | University  | Employed   | 18.37 | Urban | No  |
| 30 | Male   | High school | Employed   | 19.61 | Urban | No  |
| 39 | Male   | University  | Employed   | 24.66 | Urban | No  |
| 34 | Male   | High school | Employed   | 20.20 | Rural | No  |
| 28 | Male   | University  | Employed   | 22.10 | Urban | No  |
| 36 | Male   | University  | Employed   | 19.59 | Urban | No  |

|    |        |             |            |       |       |     |
|----|--------|-------------|------------|-------|-------|-----|
| 40 | Male   | University  | Employed   | 24.22 | Urban | No  |
| 26 | Female | University  | Employed   | 22.86 | Urban | Yes |
| 34 | Male   | High school | Employed   | 21.22 | Urban | No  |
| 23 | Female | University  | Student    | 22.04 | Urban | Yes |
| 34 | Male   | University  | Employed   | 20.51 | Rural | No  |
| 44 | Male   | University  | Employed   | 29.86 | Urban | No  |
| 38 | Male   | University  | Employed   | 16.71 | Urban | No  |
| 29 | Male   | University  | Unemployed | 16.98 | Urban | Yes |
| 28 | Female | University  | Employed   | 17.10 | Urban | No  |
| 29 | Male   | High school | Employed   | 21.60 | Urban | No  |
| 23 | Male   | University  | Employed   | 18.52 | Urban | No  |
| 25 | Female | University  | Unemployed | 17.58 | Urban | No  |
| 32 | Male   | University  | Employed   | 20.57 | Rural | No  |
| 38 | Male   | University  | Employed   | 21.30 | Urban | No  |
| 30 | Male   | University  | Employed   | 31.17 | Urban | No  |
| 32 | Male   | University  | Employed   | 23.88 | Urban | No  |
| 37 | Male   | University  | Employed   | 17.99 | Urban | No  |
| 24 | Male   | University  | Student    | 21.22 | Urban | No  |
| 20 | Female | High school | Unemployed | 20.20 | Rural | No  |
| 38 | Male   | University  | Employed   | 19.38 | Urban | No  |
| 34 | Male   | University  | Employed   | 24.80 | Urban | No  |
| 22 | Female | University  | Student    | 20.05 | Rural | No  |
| 22 | Female | University  | Student    | 21.97 | Urban | No  |
| 23 | Male   | University  | Student    | 21.37 | Urban | No  |
| 24 | Male   | University  | Student    | 24.62 | Urban | No  |
| 32 | Female | University  | Unemployed | 26.45 | Urban | Yes |
| 29 | Male   | University  | Employed   | 20.07 | Urban | No  |
| 40 | Male   | High school | Unemployed | 20.42 | Urban | Yes |
| 34 | Male   | University  | Employed   | 24.22 | Urban | No  |
| 32 | Female | University  | Employed   | 22.31 | Urban | No  |
| 29 | Male   | University  | Student    | 22.50 | Urban | No  |
| 30 | Male   | High school | Employed   | 19.57 | Rural | No  |
| 20 | Male   | High school | Student    | 20.52 | Urban | Yes |
| 29 | Male   | University  | Employed   | 18.04 | Urban | No  |
| 28 | Female | University  | Student    | 21.09 | Urban | No  |
| 27 | Male   | High school | Employed   | 19.94 | Urban | Yes |
| 28 | Male   | High school | Employed   | 23.15 | Rural | No  |
| 30 | Male   | High school | Unemployed | 25.35 | Urban | No  |
| 34 | Female | University  | Employed   | 28.04 | Urban | No  |
| 33 | Male   | University  | Employed   | 23.12 | Urban | No  |
| 25 | Male   | University  | Student    | 18.10 | Urban | No  |
| 27 | Male   | University  | Employed   | 28.34 | Urban | No  |
| 30 | Male   | University  | Unemployed | 24.07 | Urban | No  |
| 30 | Female | University  | Employed   | 22.10 | Urban | No  |
| 40 | Male   | High school | Employed   | 22.84 | Urban | No  |
| 21 | Female | University  | Student    | 24.61 | Urban | No  |

|    |        |             |            |       |       |     |
|----|--------|-------------|------------|-------|-------|-----|
| 26 | Male   | University  | Unemployed | 26.30 | Urban | No  |
| 24 | Male   | University  | Unemployed | 19.92 | Urban | No  |
| 30 | Male   | University  | Employed   | 25.31 | Urban | Yes |
| 30 | Male   | University  | Employed   | 21.86 | Urban | No  |
| 43 | Male   | University  | Employed   | 21.78 | Urban | No  |
| 25 | Male   | University  | Student    | 17.96 | Urban | No  |
| 24 | Female | University  | Student    | 19.83 | Urban | No  |
| 30 | Female | University  | Unemployed | 18.29 | Urban | No  |
| 40 | Male   | University  | Employed   | 18.71 | Urban | No  |
| 34 | Male   | High school | Employed   | 19.57 | Urban | No  |
| 30 | Male   | University  | Employed   | 24.22 | Urban | No  |
| 37 | Male   | High school | Employed   | 15.95 | Urban | No  |
| 28 | Female | University  | Unemployed | 16.81 | Urban | Yes |
| 22 | Male   | University  | Student    | 21.95 | Urban | No  |
| 34 | Female | University  | Unemployed | 19.57 | Urban | No  |
| 25 | Female | University  | Employed   | 17.30 | Urban | No  |
| 34 | Male   | University  | Employed   | 18.99 | Urban | No  |
| 23 | Female | University  | Employed   | 20.08 | Urban | No  |
| 46 | Female | High school | Employed   | 28.13 | Urban | No  |
| 24 | Male   | University  | Employed   | 18.99 | Urban | No  |
| 22 | Female | University  | Student    | 20.05 | Urban | Yes |
| 22 | Male   | Secondary   | Employed   | 13.89 | Urban | Yes |
| 24 | Female | University  | Student    | 17.26 | Urban | No  |
| 30 | Male   | High school | Employed   | 19.61 | Urban | No  |
| 21 | Female | University  | Student    | 19.47 | Urban | No  |
| 22 | Male   | Secondary   | Unemployed | 21.50 | Urban | Yes |
| 22 | Female | University  | Student    | 17.10 | Urban | No  |
| 22 | Female | University  | Student    | 17.10 | Urban | No  |
| 20 | Female | University  | Student    | 19.03 | Urban | No  |
| 29 | Male   | High school | Unemployed | 23.51 | Urban | Yes |
| 17 | Male   | High school | Unemployed | 20.52 | Urban | No  |
| 16 | Female | High school | Unemployed | 20.20 | Urban | No  |
| 29 | Female | University  | Employed   | 19.36 | Urban | Yes |
| 18 | Male   | University  | Student    | 19.84 | Urban | Yes |
| 21 | Female | University  | Student    | 20.81 | Urban | No  |
| 34 | Female | High school | Employed   | 22.77 | Rural | No  |
| 40 | Male   | University  | Employed   | 18.72 | Urban | No  |
| 19 | Female | University  | Student    | 20.76 | Urban | Yes |
| 20 | Female | University  | Student    | 19.10 | Urban | No  |
| 20 | Female | University  | Student    | 21.26 | Urban | No  |
| 21 | Female | University  | Student    | 23.73 | Urban | No  |
| 26 | Female | University  | Student    | 25.65 | Urban | Yes |
| 20 | Female | University  | Student    | 20.24 | Urban | No  |
| 29 | Male   | University  | Student    | 27.99 | Urban | Yes |
| 20 | Female | University  | Student    | 19.84 | Urban | No  |
| 26 | Male   | University  | Employed   | 23.37 | Urban | Yes |

|    |        |             |            |       |       |     |
|----|--------|-------------|------------|-------|-------|-----|
| 20 | Female | University  | Student    | 17.30 | Rural | No  |
| 27 | Female | University  | Employed   | 21.60 | Urban | No  |
| 24 | Female | University  | Student    | 32.53 | Urban | No  |
| 19 | Male   | High school | Unemployed | 15.74 | Urban | Yes |
| 27 | Female | University  | Unemployed | 23.18 | Urban | No  |
| 21 | Female | University  | Student    | 17.84 | Urban | No  |
| 19 | Male   | University  | Student    | 20.29 | Urban | No  |
| 33 | Female | University  | Employed   | 19.83 | Urban | No  |
| 29 | Female | University  | Employed   | 25.34 | Urban | Yes |
| 34 | Female | University  | Employed   | 21.11 | Urban | No  |
| 15 | Female | High school | Unemployed | 15.70 | Urban | Yes |
| 23 | Female | University  | Student    | 21.77 | Urban | No  |
| 23 | Female | University  | Student    | 21.61 | Rural | No  |
| 19 | Female | University  | Student    | 17.80 | Urban | No  |
| 42 | Male   | University  | Employed   | 24.22 | Urban | No  |
| 24 | Female | University  | Student    | 22.04 | Urban | No  |
| 26 | Female | University  | Employed   | 17.63 | Urban | No  |
| 28 | Female | University  | Employed   | 21.30 | Urban | No  |
| 29 | Female | University  | Unemployed | 19.53 | Urban | No  |
| 24 | Female | University  | Employed   | 23.07 | Urban | No  |
| 19 | Female | University  | Student    | 22.58 | Urban | Yes |
| 31 | Male   | University  | Employed   | 21.55 | Rural | No  |
| 23 | Female | University  | Student    | 17.15 | Urban | No  |
| 23 | Female | University  | Student    | 18.37 | Urban | No  |
| 22 | Female | University  | Student    | 28.00 | Urban | No  |
| 20 | Female | University  | Student    | 17.80 | Urban | No  |
| 21 | Female | University  | Student    | 19.38 | Urban | No  |
| 21 | Male   | University  | Student    | 18.12 | Urban | No  |
| 22 | Female | University  | Student    | 17.93 | Urban | No  |
| 50 | Male   | Secondary   | Student    | 24.38 | Urban | Yes |
| 20 | Female | University  | Student    | 19.10 | Urban | No  |
| 23 | Female | University  | Employed   | 21.72 | Rural | No  |
| 20 | Female | University  | Student    | 19.53 | Urban | No  |
| 24 | Female | University  | Student    | 18.90 | Urban | No  |
| 22 | Female | University  | Employed   | 17.10 | Urban | No  |
| 20 | Female | University  | Student    | 19.92 | Urban | No  |
| 20 | Female | High school | Unemployed | 18.26 | Urban | No  |
| 24 | Female | University  | Unemployed | 22.03 | Urban | No  |
| 30 | Male   | High school | Employed   | 16.98 | Urban | No  |
| 23 | Female | University  | Student    | 26.40 | Urban | No  |
| 33 | Female | University  | Employed   | 20.20 | Urban | No  |
| 24 | Female | University  | Unemployed | 18.67 | Urban | No  |
| 22 | Male   | University  | Employed   | 20.62 | Urban | No  |
| 22 | Female | University  | Student    | 20.42 | Urban | No  |
| 19 | Female | University  | Student    | 23.88 | Urban | Yes |
| 29 | Male   | University  | Employed   | 16.30 | Urban | No  |

|    |        |             |            |       |       |     |
|----|--------|-------------|------------|-------|-------|-----|
| 25 | Female | University  | Employed   | 19.49 | Urban | No  |
| 40 | Male   | High school | Employed   | 19.26 | Urban | No  |
| 32 | Male   | University  | Employed   | 24.62 | Urban | No  |
| 19 | Male   | University  | Student    | 24.07 | Urban | No  |
| 24 | Female | University  | Student    | 20.31 | Urban | No  |
| 19 | Female | High school | Unemployed | 18.61 | Urban | No  |
| 25 | Female | University  | Student    | 20.76 | Urban | No  |
| 28 | Female | University  | Unemployed | 18.00 | Urban | No  |
| 29 | Female | University  | Employed   | 18.67 | Rural | Yes |
| 34 | Male   | University  | Employed   | 19.37 | Urban | No  |
| 21 | Female | University  | Student    | 18.82 | Urban | No  |
| 25 | Male   | University  | Student    | 17.51 | Urban | No  |
| 30 | Female | University  | Employed   | 18.59 | Urban | Yes |
| 29 | Female | University  | Employed   | 22.59 | Urban | No  |
| 81 | Male   | University  | Employed   | 23.45 | Urban | Yes |
| 22 | Female | University  | Student    | 24.17 | Urban | No  |
| 25 | Female | University  | Student    | 19.53 | Urban | No  |
| 32 | Female | University  | Employed   | 22.66 | Urban | No  |
| 29 | Female | University  | Employed   | 19.68 | Urban | No  |
| 29 | Male   | University  | Employed   | 33.22 | Urban | No  |
| 26 | Female | University  | Employed   | 19.29 | Urban | No  |
| 27 | Female | University  | Employed   | 21.36 | Urban | No  |
| 26 | Female | University  | Student    | 17.94 | Urban | No  |
| 26 | Female | University  | Unemployed | 23.12 | Urban | No  |
| 28 | Female | University  | Student    | 19.71 | Urban | No  |
| 22 | Female | University  | Student    | 18.75 | Urban | No  |
| 33 | Female | University  | Employed   | 25.71 | Urban | Yes |
| 28 | Female | University  | Employed   | 17.42 | Urban | No  |
| 42 | Female | University  | Employed   | 33.53 | Urban | Yes |
| 23 | Female | University  | Student    | 24.97 | Urban | No  |
| 22 | Female | University  | Student    | 19.61 | Urban | No  |
| 29 | Female | University  | Employed   | 23.44 | Urban | No  |
| 29 | Female | University  | Employed   | 17.99 | Urban | No  |
| 23 | Female | University  | Student    | 16.33 | Urban | No  |
| 21 | Female | University  | Student    | 17.93 | Urban | Yes |
| 33 | Female | University  | Employed   | 21.09 | Urban | No  |
| 22 | Female | University  | Student    | 19.63 | Urban | No  |
| 30 | Female | University  | Employed   | 20.69 | Urban | No  |
| 22 | Female | University  | Student    | 21.67 | Urban | Yes |
| 17 | Female | High school | Unemployed | 20.00 | Urban | No  |
| 23 | Female | University  | Student    | 17.92 | Urban | Yes |
| 22 | Female | University  | Student    | 19.56 | Urban | No  |
| 31 | Female | University  | Employed   | 22.84 | Urban | No  |
| 23 | Female | University  | Student    | 18.74 | Rural | No  |
| 30 | Female | University  | Employed   | 16.41 | Urban | Yes |
| 22 | Female | University  | Student    | 22.95 | Urban | No  |

|    |        |            |            |       |       |    |
|----|--------|------------|------------|-------|-------|----|
| 23 | Male   | University | Student    | 19.11 | Urban | No |
| 27 | Female | University | Unemployed | 25.56 | Urban | No |
